# Supplementary material
Source: MDPI journal article supplement (https://www.mdpi.com/2504-446X/7/3/220)

Figure S1. Study area.

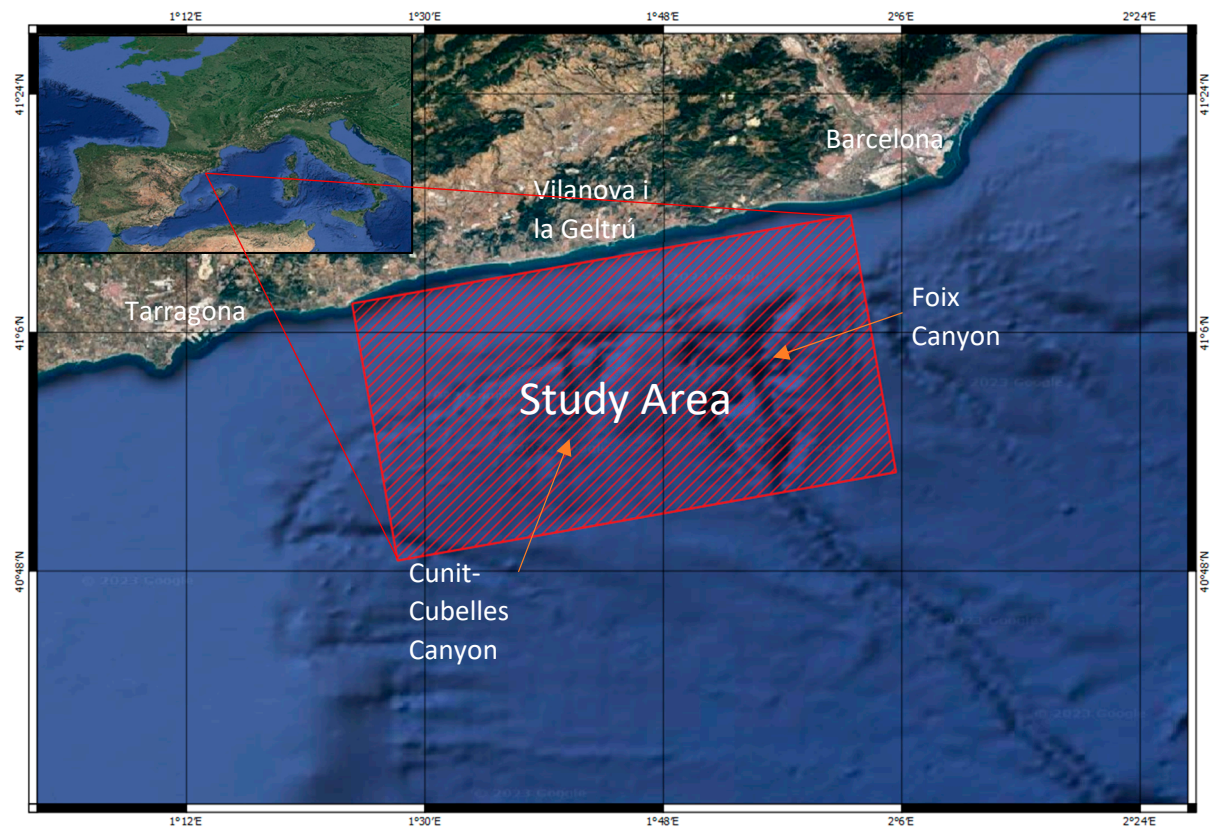

Supplement: s1 [file s1]
